# Supplementary material for: Computational Reconstruction of NFκB Pathway Interaction Mechanisms during Prostate Cancer
Source: PLoS Comput Biol. 2016 Apr 14;12(4):e1004820. doi: 10.1371/journal.pcbi.1004820 (PMC4831844; doi:10.1371/journal.pcbi.1004820)
Supplement: S13 Table — (XLSX) [file pcbi.1004820.s020.xlsx]

## Sheet: Sheet1
S13 Table: We analyzed the 40 newly predicted genes (excluding 5 NFKB complex genes and 5 NFKB inhibitor genes, see S12 Table) (A) from our novel NFκB pathway for gene set enrichments [27] on Gene Ontology categories, pathways from KEGG and NCI, and diseases from the NIH Cancer Gene Index (B).
(A) Query gene list
AREG
ATF3
BCL2A1
BDKRB2
BIRC3
BMP2
CCL20
CCL3
CCL8
CFHR1
CXCL1
CXCL2
CXCL3
DUSP2
DUSP5
GPR171
IER2
IER3
IL18R1
IL4R
IRF1
JUNB
KLF6
LIF
MAP3K8
NEDD9
NR4A2
PALMD
PFKFB3
PTGS2
PTX3
RRAD
SELE
SNAI1
STAT3
STX11
TICAM1
TNFAIP3
TRIB1
ZFP36
(B) Enrichment results
Feature ID	Name	Data Source	In Query	In Test Set	Genes	P Value (FDR)	Bayes factor
GO Hierarchy - Molecular Function Enrichment:
GO:0042379	chemokine receptor binding	GO Hierarchy	7	55	CCL20 CCL3 CCL8 CXCL1 CXCL2 CXCL3 STAT3	1.15e-08	21.63
GO:0005125	cytokine activity	GO Hierarchy	9	210	AREG BMP2 CCL20 CCL3 CCL8 CXCL1 CXCL2 CXCL3 LIF	1.02e-07	18.773
GO:0008009	chemokine activity	GO Hierarchy	6	47	CCL20 CCL3 CCL8 CXCL1 CXCL2 CXCL3	1.26e-07	18.135
GO:0001664	G-protein coupled receptor binding	GO Hierarchy	8	193	BDKRB2 CCL20 CCL3 CCL8 CXCL1 CXCL2 CXCL3 STAT3	7.64e-07	16.071
GO:0005126	cytokine receptor binding	GO Hierarchy	8	217	CCL20 CCL3 CCL8 CXCL1 CXCL2 CXCL3 LIF STAT3	1.54e-06	15.154
GO:0005102	receptor binding	GO Hierarchy	11	1204	AREG BDKRB2 BMP2 CCL20 CCL3 CCL8 CXCL1 CXCL2 CXCL3 LIF STAT3	0.002	7.91
GO:0019900	kinase binding	GO Hierarchy	7	410	DUSP2 SNAI1 STAT3 TICAM1 TNFAIP3 TRIB1 ZFP36	0.002	7.787
GO:0031730	CCR5 chemokine receptor binding	GO Hierarchy	2	4	CCL3 STAT3	0.003	7.051
GO:0019899	enzyme binding	GO Hierarchy	10	1105	BDKRB2 DUSP2 PTGS2 SELE SNAI1 STAT3 TICAM1 TNFAIP3 TRIB1 ZFP36	0.004	6.819
GO:0016004	phospholipase activator activity	GO Hierarchy	2	6	CCL3 CCL8	0.006	6.138
GO:0060229	lipase activator activity	GO Hierarchy	2	8	CCL3 CCL8	0.01	5.518
GO:0008083	growth factor activity	GO Hierarchy	4	165	AREG BMP2 CXCL1 LIF	0.026	4.562
GO:0017017	MAP kinase tyrosine/serine/threonine phosphatase activity	GO Hierarchy	2	13	DUSP2 DUSP5	0.026	4.502
GO:0048020	CCR chemokine receptor binding	GO Hierarchy	2	14	CCL3 STAT3	0.026	4.35
GO:0033549	MAP kinase phosphatase activity	GO Hierarchy	2	14	DUSP2 DUSP5	0.026	4.35
GO:0019901	protein kinase binding	GO Hierarchy	5	369	DUSP2 STAT3 TICAM1 TRIB1 ZFP36	0.047	3.735
GO Hierarchy - Biological Process Enrichment:
GO:0006954	inflammatory response	GO Hierarchy	15	375	BDKRB2 BMP2 CCL20 CCL3 CCL8 CXCL1 CXCL2 CXCL3 IL4R PTGS2 PTX3 SELE STAT3 TICAM1 TNFAIP3	1.53e-12	32.953
GO:0009611	response to wounding	GO Hierarchy	16	980	BDKRB2 BMP2 CCL20 CCL3 CCL8 CXCL1 CXCL2 CXCL3 IL4R IRF1 PTGS2 PTX3 SELE STAT3 TICAM1 TNFAIP3	6.16e-08	21.697
GO:0006952	defense response	GO Hierarchy	17	1173	BDKRB2 BIRC3 BMP2 CCL20 CCL3 CCL8 CXCL1 CXCL2 CXCL3 IL4R IRF1 PTGS2 PTX3 SELE STAT3 TICAM1 TNFAIP3	6.16e-08	21.528
GO:0002376	immune system process	GO Hierarchy	19	1750	BIRC3 CCL20 CCL3 CCL8 CFHR1 CXCL1 CXCL2 CXCL3 IL18R1 IL4R IRF1 JUNB KLF6 LIF MAP3K8 PTX3 SELE TICAM1 TNFAIP3	2.13e-07	19.789
GO:0007165	signal transduction	GO Hierarchy	25	3709	AREG ATF3 BDKRB2 BIRC3 BMP2 CCL20 CCL3 CCL8 CXCL1 GPR171 IL18R1 IL4R IRF1 JUNB KLF6 LIF NEDD9 NR4A2 RRAD SELE SNAI1 STAT3 TICAM1 TNFAIP3 TRIB1	8.93e-07	18.166
GO:0050896	response to stimulus	GO Hierarchy	31	6309	AREG ATF3 BDKRB2 BIRC3 BMP2 CCL20 CCL3 CCL8 CFHR1 CXCL1 CXCL2 CXCL3 GPR171 IL18R1 IL4R IRF1 JUNB KLF6 LIF NEDD9 NR4A2 PTGS2 PTX3 RRAD SELE SNAI1 STAT3 TICAM1 TNFAIP3 TRIB1 ZFP36	1.63e-06	17.378
GO:0051716	cellular response to stimulus	GO Hierarchy	27	4693	AREG ATF3 BDKRB2 BIRC3 BMP2 CCL20 CCL3 CCL8 CXCL1 CXCL3 GPR171 IL18R1 IL4R IRF1 JUNB KLF6 LIF NEDD9 NR4A2 PTGS2 RRAD SELE SNAI1 STAT3 TICAM1 TNFAIP3 TRIB1	2.4e-06	16.851
GO:0051707	response to other organism	GO Hierarchy	11	548	CCL20 CCL3 CCL8 CXCL2 IRF1 PTGS2 PTX3 SELE TICAM1 TNFAIP3 TRIB1	6.31e-06	15.677
GO:0044700	single organism signaling	GO Hierarchy	25	4184	AREG ATF3 BDKRB2 BIRC3 BMP2 CCL20 CCL3 CCL8 CXCL1 GPR171 IL18R1 IL4R IRF1 JUNB KLF6 LIF NEDD9 NR4A2 RRAD SELE SNAI1 STAT3 TICAM1 TNFAIP3 TRIB1	6.85e-06	15.562
GO:0023052	signaling	GO Hierarchy	25	4184	AREG ATF3 BDKRB2 BIRC3 BMP2 CCL20 CCL3 CCL8 CXCL1 GPR171 IL18R1 IL4R IRF1 JUNB KLF6 LIF NEDD9 NR4A2 RRAD SELE SNAI1 STAT3 TICAM1 TNFAIP3 TRIB1	6.85e-06	15.562
GO:0050789	regulation of biological process	GO Hierarchy	34	8355	AREG ATF3 BCL2A1 BDKRB2 BIRC3 BMP2 CCL20 CCL3 CCL8 CFHR1 CXCL1 DUSP2 DUSP5 GPR171 IL18R1 IL4R IRF1 JUNB KLF6 LIF MAP3K8 NEDD9 NR4A2 PALMD PTGS2 PTX3 RRAD SELE SNAI1 STAT3 TICAM1 TNFAIP3 TRIB1 ZFP36	6.85e-06	15.52
GO:0006955	immune response	GO Hierarchy	14	1077	BIRC3 CCL20 CCL3 CCL8 CFHR1 CXCL1 CXCL2 CXCL3 IL18R1 IL4R IRF1 LIF TICAM1 TNFAIP3	6.85e-06	15.43
GO:0006950	response to stress	GO Hierarchy	21	2881	ATF3 BDKRB2 BIRC3 BMP2 CCL20 CCL3 CCL8 CXCL1 CXCL2 CXCL3 IL4R IRF1 NR4A2 PTGS2 PTX3 SELE STAT3 TICAM1 TNFAIP3 TRIB1 ZFP36	6.85e-06	15.239
GO:0009607	response to biotic stimulus	GO Hierarchy	11	573	CCL20 CCL3 CCL8 CXCL2 IRF1 PTGS2 PTX3 SELE TICAM1 TNFAIP3 TRIB1	6.85e-06	15.217
GO:0007154	cell communication	GO Hierarchy	25	4311	AREG ATF3 BDKRB2 BIRC3 BMP2 CCL20 CCL3 CCL8 CXCL1 GPR171 IL18R1 IL4R IRF1 JUNB KLF6 LIF NEDD9 NR4A2 RRAD SELE SNAI1 STAT3 TICAM1 TNFAIP3 TRIB1	7.81e-06	14.926
GO:0009893	positive regulation of metabolic process	GO Hierarchy	18	2080	AREG ATF3 BMP2 CCL3 IRF1 JUNB KLF6 LIF NR4A2 PTGS2 PTX3 SELE SNAI1 STAT3 TICAM1 TNFAIP3 TRIB1 ZFP36	8.22e-06	14.787
GO:0065007	biological regulation	GO Hierarchy	34	8832	AREG ATF3 BCL2A1 BDKRB2 BIRC3 BMP2 CCL20 CCL3 CCL8 CFHR1 CXCL1 DUSP2 DUSP5 GPR171 IL18R1 IL4R IRF1 JUNB KLF6 LIF MAP3K8 NEDD9 NR4A2 PALMD PTGS2 PTX3 RRAD SELE SNAI1 STAT3 TICAM1 TNFAIP3 TRIB1 ZFP36	2.5e-05	13.86
GO:0048522	positive regulation of cellular process	GO Hierarchy	21	3137	AREG ATF3 BIRC3 BMP2 CCL3 IL4R IRF1 JUNB KLF6 LIF MAP3K8 NR4A2 PTGS2 PTX3 SELE SNAI1 STAT3 TICAM1 TNFAIP3 TRIB1 ZFP36	2.32e-05	13.716
GO:0050794	regulation of cellular process	GO Hierarchy	32	7855	AREG ATF3 BCL2A1 BDKRB2 BIRC3 BMP2 CCL20 CCL3 CCL8 CXCL1 DUSP2 DUSP5 GPR171 IL18R1 IL4R IRF1 JUNB KLF6 LIF MAP3K8 NEDD9 NR4A2 PTGS2 PTX3 RRAD SELE SNAI1 STAT3 TICAM1 TNFAIP3 TRIB1 ZFP36	3.41e-05	13.357
GO:0048518	positive regulation of biological process	GO Hierarchy	22	3610	AREG ATF3 BIRC3 BMP2 CCL3 CFHR1 IL4R IRF1 JUNB KLF6 LIF MAP3K8 NR4A2 PTGS2 PTX3 SELE SNAI1 STAT3 TICAM1 TNFAIP3 TRIB1 ZFP36	4.12e-05	12.992
GO:0051704	multi-organism process	GO Hierarchy	14	1374	CCL20 CCL3 CCL8 CXCL2 IRF1 JUNB LIF PTGS2 PTX3 SELE STAT3 TICAM1 TNFAIP3 TRIB1	6.81e-05	12.393
GO:0002237	response to molecule of bacterial origin	GO Hierarchy	7	211	CCL3 CXCL2 PTGS2 SELE TICAM1 TNFAIP3 TRIB1	7.48e-05	12.168
GO:0010604	positive regulation of macromolecule metabolic process	GO Hierarchy	16	1928	AREG ATF3 BMP2 CCL3 IRF1 JUNB KLF6 LIF NR4A2 SELE SNAI1 STAT3 TICAM1 TNFAIP3 TRIB1 ZFP36	9.68e-05	11.975
GO:0042221	response to chemical stimulus	GO Hierarchy	19	2811	ATF3 BMP2 CCL20 CCL3 CCL8 CXCL1 CXCL2 CXCL3 IL4R IRF1 JUNB KLF6 NR4A2 PTGS2 SELE STAT3 TICAM1 TNFAIP3 TRIB1	9.83e-05	11.94
GO:0009617	response to bacterium	GO Hierarchy	8	339	CCL20 CCL3 CXCL2 PTGS2 SELE TICAM1 TNFAIP3 TRIB1	0.000104	11.726
GO:0031325	positive regulation of cellular metabolic process	GO Hierarchy	16	1972	AREG ATF3 BMP2 IRF1 JUNB KLF6 LIF NR4A2 PTGS2 PTX3 SELE SNAI1 STAT3 TICAM1 TRIB1 ZFP36	0.000117	11.668
GO:0048523	negative regulation of cellular process	GO Hierarchy	19	2866	ATF3 BCL2A1 BDKRB2 BIRC3 BMP2 CCL3 CXCL1 DUSP2 DUSP5 IL4R IRF1 LIF NR4A2 PTGS2 SNAI1 STAT3 TNFAIP3 TRIB1 ZFP36	0.000119	11.634
GO:0051173	positive regulation of nitrogen compound metabolic process	GO Hierarchy	13	1253	AREG BMP2 IRF1 JUNB KLF6 LIF NR4A2 PTGS2 PTX3 SNAI1 STAT3 TICAM1 ZFP36	0.000135	11.421
GO:0007166	cell surface receptor signaling pathway	GO Hierarchy	16	2084	AREG BDKRB2 BIRC3 BMP2 CCL3 CXCL1 GPR171 IL4R IRF1 JUNB KLF6 LIF NEDD9 SNAI1 STAT3 TICAM1	0.000223	10.923
GO:0044699	single-organism process	GO Hierarchy	35	10447	AREG ATF3 BCL2A1 BDKRB2 BIRC3 BMP2 CCL20 CCL3 CCL8 CFHR1 CXCL1 CXCL3 DUSP2 DUSP5 GPR171 IL18R1 IL4R IRF1 JUNB KLF6 LIF MAP3K8 NEDD9 NR4A2 PTGS2 PTX3 RRAD SELE SNAI1 STAT3 STX11 TICAM1 TNFAIP3 TRIB1 ZFP36	0.000271	10.771
GO:0033993	response to lipid	GO Hierarchy	9	540	CCL3 IL4R JUNB PTGS2 SELE STAT3 TICAM1 TNFAIP3 TRIB1	0.000258	10.663
GO:0010627	regulation of intracellular protein kinase cascade	GO Hierarchy	10	714	BIRC3 BMP2 CCL3 DUSP2 DUSP5 LIF PTGS2 TICAM1 TNFAIP3 TRIB1	0.000263	10.624
GO:0031324	negative regulation of cellular metabolic process	GO Hierarchy	13	1393	ATF3 BDKRB2 BIRC3 BMP2 CCL3 DUSP2 DUSP5 IRF1 SNAI1 STAT3 TNFAIP3 TRIB1 ZFP36	0.000384	10.23
GO:0010033	response to organic substance	GO Hierarchy	15	1927	ATF3 BMP2 CCL3 CXCL2 IL4R IRF1 JUNB KLF6 NR4A2 PTGS2 SELE STAT3 TICAM1 TNFAIP3 TRIB1	0.000421	10.13
GO:0048519	negative regulation of biological process	GO Hierarchy	19	3216	ATF3 BCL2A1 BDKRB2 BIRC3 BMP2 CCL3 CXCL1 DUSP2 DUSP5 IL4R IRF1 LIF NR4A2 PTGS2 SNAI1 STAT3 TNFAIP3 TRIB1 ZFP36	0.001	9.848
GO:0032496	response to lipopolysaccharide	GO Hierarchy	6	200	CCL3 PTGS2 SELE TICAM1 TNFAIP3 TRIB1	0.001	9.439
GO:0009892	negative regulation of metabolic process	GO Hierarchy	13	1503	ATF3 BDKRB2 BIRC3 BMP2 CCL3 DUSP2 DUSP5 IRF1 SNAI1 STAT3 TNFAIP3 TRIB1 ZFP36	0.001	9.39
GO:0034097	response to cytokine stimulus	GO Hierarchy	8	466	CCL3 IL4R IRF1 JUNB KLF6 PTGS2 SELE STAT3	0.001	9.356
GO:0031323	regulation of cellular metabolic process	GO Hierarchy	22	4509	AREG ATF3 BDKRB2 BIRC3 BMP2 CCL3 DUSP2 DUSP5 IRF1 JUNB KLF6 LIF NR4A2 PTGS2 PTX3 SELE SNAI1 STAT3 TICAM1 TNFAIP3 TRIB1 ZFP36	0.001	9.043
GO:0031328	positive regulation of cellular biosynthetic process	GO Hierarchy	12	1317	AREG BMP2 IRF1 JUNB KLF6 LIF NR4A2 PTGS2 PTX3 SNAI1 STAT3 TICAM1	0.001	8.914
GO:0042326	negative regulation of phosphorylation	GO Hierarchy	6	221	BDKRB2 BIRC3 DUSP2 DUSP5 TNFAIP3 TRIB1	0.001	8.867
GO:0019222	regulation of metabolic process	GO Hierarchy	23	4962	AREG ATF3 BDKRB2 BIRC3 BMP2 CCL3 CXCL1 DUSP2 DUSP5 IRF1 JUNB KLF6 LIF NR4A2 PTGS2 PTX3 SELE SNAI1 STAT3 TICAM1 TNFAIP3 TRIB1 ZFP36	0.001	8.856
GO:0048583	regulation of response to stimulus	GO Hierarchy	16	2459	BIRC3 BMP2 CCL3 CFHR1 DUSP2 DUSP5 IL4R IRF1 LIF PTGS2 SELE SNAI1 STAT3 TICAM1 TNFAIP3 TRIB1	0.001	8.748
GO:0009891	positive regulation of biosynthetic process	GO Hierarchy	12	1339	AREG BMP2 IRF1 JUNB KLF6 LIF NR4A2 PTGS2 PTX3 SNAI1 STAT3 TICAM1	0.001	8.746
GO:0046697	decidualization	GO Hierarchy	3	17	JUNB LIF PTGS2	0.001	8.655
GO:0010605	negative regulation of macromolecule metabolic process	GO Hierarchy	12	1393	ATF3 BDKRB2 BMP2 CCL3 DUSP2 DUSP5 IRF1 SNAI1 STAT3 TNFAIP3 TRIB1 ZFP36	0.002	8.346
GO:0001817	regulation of cytokine production	GO Hierarchy	7	383	CCL3 IL4R IRF1 PTGS2 TICAM1 TNFAIP3 ZFP36	0.002	8.224
GO:0042981	regulation of apoptotic process	GO Hierarchy	11	1172	BCL2A1 BDKRB2 BIRC3 BMP2 CCL3 DUSP2 IRF1 NR4A2 PTGS2 SNAI1 TNFAIP3	0.002	8.161
GO:0002682	regulation of immune system process	GO Hierarchy	10	948	BIRC3 CCL3 CFHR1 IL4R IRF1 LIF MAP3K8 SELE TICAM1 TNFAIP3	0.002	8.122
GO:0043067	regulation of programmed cell death	GO Hierarchy	11	1184	BCL2A1 BDKRB2 BIRC3 BMP2 CCL3 DUSP2 IRF1 NR4A2 PTGS2 SNAI1 TNFAIP3	0.002	8.066
GO:0080134	regulation of response to stress	GO Hierarchy	9	757	BIRC3 BMP2 CCL3 IRF1 PTGS2 SELE SNAI1 TICAM1 TNFAIP3	0.002	7.935
GO:0032680	regulation of tumor necrosis factor production	GO Hierarchy	4	70	CCL3 TICAM1 TNFAIP3 ZFP36	0.002	7.878
GO:0010941	regulation of cell death	GO Hierarchy	11	1221	BCL2A1 BDKRB2 BIRC3 BMP2 CCL3 DUSP2 IRF1 NR4A2 PTGS2 SNAI1 TNFAIP3	0.003	7.78
GO:0010563	negative regulation of phosphorus metabolic process	GO Hierarchy	6	275	BDKRB2 BIRC3 DUSP2 DUSP5 TNFAIP3 TRIB1	0.003	7.63
GO:0045936	negative regulation of phosphate metabolic process	GO Hierarchy	6	275	BDKRB2 BIRC3 DUSP2 DUSP5 TNFAIP3 TRIB1	0.003	7.63
GO:0001649	osteoblast differentiation	GO Hierarchy	4	75	BMP2 CCL3 JUNB SNAI1	0.003	7.605
GO:0002684	positive regulation of immune system process	GO Hierarchy	8	596	BIRC3 CCL3 CFHR1 IL4R MAP3K8 SELE TICAM1 TNFAIP3	0.003	7.578
GO:0001893	maternal placenta development	GO Hierarchy	3	25	JUNB LIF PTGS2	0.003	7.451
GO:0031347	regulation of defense response	GO Hierarchy	7	443	BIRC3 CCL3 IRF1 PTGS2 SELE TICAM1 TNFAIP3	0.004	7.294
GO:0044763	single-organism cellular process	GO Hierarchy	31	9364	AREG ATF3 BCL2A1 BDKRB2 BIRC3 BMP2 CCL20 CCL3 CCL8 CXCL1 CXCL3 GPR171 IL18R1 IL4R IRF1 JUNB KLF6 LIF MAP3K8 NEDD9 NR4A2 PTGS2 RRAD SELE SNAI1 STAT3 STX11 TICAM1 TNFAIP3 TRIB1 ZFP36	0.006	7.213
GO:0009966	regulation of signal transduction	GO Hierarchy	13	1855	BIRC3 BMP2 CCL3 DUSP2 DUSP5 IRF1 LIF PTGS2 SNAI1 STAT3 TICAM1 TNFAIP3 TRIB1	0.005	7.137
GO:0045596	negative regulation of cell differentiation	GO Hierarchy	7	458	BMP2 CCL3 IL4R IRF1 LIF SNAI1 STAT3	0.005	7.083
GO:0051239	regulation of multicellular organismal process	GO Hierarchy	13	1866	BDKRB2 BMP2 CCL3 IL4R IRF1 LIF NR4A2 PTGS2 SNAI1 STAT3 TICAM1 TNFAIP3 ZFP36	0.005	7.076
GO:0034121	regulation of toll-like receptor signaling pathway	GO Hierarchy	3	29	BIRC3 IRF1 TNFAIP3	0.005	6.995
GO:0045429	positive regulation of nitric oxide biosynthetic process	GO Hierarchy	3	30	PTGS2 PTX3 TICAM1	0.005	6.892
GO:0009605	response to external stimulus	GO Hierarchy	10	1097	CCL20 CCL3 CCL8 CXCL1 CXCL2 CXCL3 IRF1 JUNB NR4A2 PTGS2	0.006	6.88
GO:0071310	cellular response to organic substance	GO Hierarchy	11	1359	ATF3 BMP2 CCL3 IL4R IRF1 JUNB KLF6 PTGS2 STAT3 TICAM1 TNFAIP3	0.006	6.801
GO:0001503	ossification	GO Hierarchy	5	192	BMP2 CCL3 JUNB PTGS2 SNAI1	0.006	6.728
GO:0042325	regulation of phosphorylation	GO Hierarchy	9	886	ATF3 BDKRB2 BIRC3 BMP2 DUSP2 DUSP5 LIF TNFAIP3 TRIB1	0.006	6.71
GO:0050727	regulation of inflammatory response	GO Hierarchy	5	195	BIRC3 CCL3 PTGS2 SELE TNFAIP3	0.006	6.654
GO:0070424	regulation of nucleotide-binding oligomerization domain containing signaling pathway	GO Hierarchy	2	5	BIRC3 TNFAIP3	0.006	6.542
GO:0010770	positive regulation of cell morphogenesis involved in differentiation	GO Hierarchy	3	34	BMP2 LIF SNAI1	0.006	6.511
GO:0023057	negative regulation of signaling	GO Hierarchy	8	697	BMP2 DUSP2 DUSP5 LIF PTGS2 SNAI1 TNFAIP3 TRIB1	0.007	6.477
GO:0010648	negative regulation of cell communication	GO Hierarchy	8	699	BMP2 DUSP2 DUSP5 LIF PTGS2 SNAI1 TNFAIP3 TRIB1	0.007	6.457
GO:0001819	positive regulation of cytokine production	GO Hierarchy	5	204	CCL3 IL4R IRF1 PTGS2 TICAM1	0.007	6.442
GO:0001933	negative regulation of protein phosphorylation	GO Hierarchy	5	206	BDKRB2 DUSP2 DUSP5 TNFAIP3 TRIB1	0.007	6.396
GO:0070887	cellular response to chemical stimulus	GO Hierarchy	12	1715	ATF3 BMP2 CCL3 CXCL3 IL4R IRF1 JUNB KLF6 PTGS2 STAT3 TICAM1 TNFAIP3	0.009	6.306
GO:0014070	response to organic cyclic compound	GO Hierarchy	7	525	BMP2 CCL3 IL4R JUNB PTGS2 STAT3 TICAM1	0.009	6.23
GO:0031665	negative regulation of lipopolysaccharide-mediated signaling pathway	GO Hierarchy	2	6	TNFAIP3 TRIB1	0.009	6.138
GO:0042127	regulation of cell proliferation	GO Hierarchy	10	1204	ATF3 BMP2 CXCL1 IL4R IRF1 LIF PTGS2 TICAM1 TNFAIP3 TRIB1	0.01	6.107
GO:0008285	negative regulation of cell proliferation	GO Hierarchy	7	536	BMP2 CXCL1 IRF1 LIF PTGS2 TNFAIP3 TRIB1	0.01	6.101
GO:0031326	regulation of cellular biosynthetic process	GO Hierarchy	17	3419	AREG ATF3 BMP2 CCL3 IRF1 JUNB KLF6 LIF NR4A2 PTGS2 PTX3 SNAI1 STAT3 TICAM1 TNFAIP3 TRIB1 ZFP36	0.011	6.034
GO:0045935	positive regulation of nucleobase-containing compound metabolic process	GO Hierarchy	10	1227	AREG BMP2 IRF1 JUNB KLF6 LIF NR4A2 SNAI1 STAT3 ZFP36	0.011	5.952
GO:0010557	positive regulation of macromolecule biosynthetic process	GO Hierarchy	10	1230	AREG BMP2 IRF1 JUNB KLF6 LIF NR4A2 SNAI1 STAT3 TICAM1	0.011	5.932
GO:0009889	regulation of biosynthetic process	GO Hierarchy	17	3448	AREG ATF3 BMP2 CCL3 IRF1 JUNB KLF6 LIF NR4A2 PTGS2 PTX3 SNAI1 STAT3 TICAM1 TNFAIP3 TRIB1 ZFP36	0.012	5.928
GO:0031349	positive regulation of defense response	GO Hierarchy	5	229	BIRC3 CCL3 PTGS2 TICAM1 TNFAIP3	0.011	5.9
GO:0050793	regulation of developmental process	GO Hierarchy	11	1505	BMP2 CCL3 IL4R IRF1 JUNB LIF PALMD PTGS2 SNAI1 STAT3 TNFAIP3	0.012	5.891
GO:0051246	regulation of protein metabolic process	GO Hierarchy	11	1506	ATF3 BDKRB2 BMP2 DUSP2 DUSP5 IRF1 LIF TICAM1 TNFAIP3 TRIB1 ZFP36	0.012	5.885
GO:0045428	regulation of nitric oxide biosynthetic process	GO Hierarchy	3	42	PTGS2 PTX3 TICAM1	0.011	5.873
GO:0023051	regulation of signaling	GO Hierarchy	13	2104	BIRC3 BMP2 CCL3 DUSP2 DUSP5 IRF1 LIF PTGS2 SNAI1 STAT3 TICAM1 TNFAIP3 TRIB1	0.012	5.849
GO:0010646	regulation of cell communication	GO Hierarchy	13	2110	BIRC3 BMP2 CCL3 DUSP2 DUSP5 IRF1 LIF PTGS2 SNAI1 STAT3 TICAM1 TNFAIP3 TRIB1	0.012	5.82
GO:0030335	positive regulation of cell migration	GO Hierarchy	5	234	BMP2 CCL3 PTGS2 SELE SNAI1	0.011	5.8
GO:0051093	negative regulation of developmental process	GO Hierarchy	7	569	BMP2 CCL3 IL4R IRF1 LIF SNAI1 STAT3	0.012	5.734
GO:2000147	positive regulation of cell motility	GO Hierarchy	5	238	BMP2 CCL3 PTGS2 SELE SNAI1	0.012	5.721
GO:0060255	regulation of macromolecule metabolic process	GO Hierarchy	19	4288	AREG ATF3 BDKRB2 BMP2 CCL3 DUSP2 DUSP5 IRF1 JUNB KLF6 LIF NR4A2 SELE SNAI1 STAT3 TICAM1 TNFAIP3 TRIB1 ZFP36	0.014	5.676
GO:0060135	maternal process involved in female pregnancy	GO Hierarchy	3	45	JUNB LIF PTGS2	0.012	5.667
GO:0040011	locomotion	GO Hierarchy	9	1019	CCL20 CCL3 CCL8 CXCL1 CXCL2 CXCL3 NR4A2 SELE SNAI1	0.013	5.652
GO:0051272	positive regulation of cellular component movement	GO Hierarchy	5	244	BMP2 CCL3 PTGS2 SELE SNAI1	0.012	5.606
GO:0040017	positive regulation of locomotion	GO Hierarchy	5	247	BMP2 CCL3 PTGS2 SELE SNAI1	0.013	5.549
GO:0030334	regulation of cell migration	GO Hierarchy	6	405	BMP2 CCL3 PTGS2 SELE SNAI1 TRIB1	0.014	5.504
GO:0051171	regulation of nitrogen compound metabolic process	GO Hierarchy	17	3587	AREG ATF3 BMP2 CCL3 IRF1 JUNB KLF6 LIF NR4A2 PTGS2 PTX3 SNAI1 STAT3 TICAM1 TNFAIP3 TRIB1 ZFP36	0.017	5.437
GO:0031399	regulation of protein modification process	GO Hierarchy	9	1052	ATF3 BDKRB2 BMP2 DUSP2 DUSP5 LIF TICAM1 TNFAIP3 TRIB1	0.016	5.415
GO:0032268	regulation of cellular protein metabolic process	GO Hierarchy	10	1315	ATF3 BDKRB2 BMP2 DUSP2 DUSP5 LIF TICAM1 TNFAIP3 TRIB1 ZFP36	0.016	5.391
GO:0001890	placenta development	GO Hierarchy	4	134	JUNB LIF PTGS2 SNAI1	0.015	5.349
GO:0045595	regulation of cell differentiation	GO Hierarchy	9	1065	BMP2 CCL3 IL4R IRF1 JUNB LIF PTGS2 SNAI1 STAT3	0.017	5.324
GO:0001932	regulation of protein phosphorylation	GO Hierarchy	8	828	ATF3 BDKRB2 BMP2 DUSP2 DUSP5 LIF TNFAIP3 TRIB1	0.017	5.301
GO:0048711	positive regulation of astrocyte differentiation	GO Hierarchy	2	9	BMP2 LIF	0.015	5.268
GO:0022603	regulation of anatomical structure morphogenesis	GO Hierarchy	7	619	BMP2 CCL3 LIF PALMD PTGS2 SNAI1 TNFAIP3	0.017	5.223
GO:2000145	regulation of cell motility	GO Hierarchy	6	427	BMP2 CCL3 PTGS2 SELE SNAI1 TRIB1	0.017	5.221
GO:0080090	regulation of primary metabolic process	GO Hierarchy	19	4454	AREG ATF3 BDKRB2 BMP2 CCL3 DUSP2 DUSP5 IRF1 JUNB KLF6 LIF NR4A2 PTGS2 SNAI1 STAT3 TICAM1 TNFAIP3 TRIB1 ZFP36	0.027	5.163
GO:0051254	positive regulation of RNA metabolic process	GO Hierarchy	9	1096	BMP2 IRF1 JUNB KLF6 LIF NR4A2 SNAI1 STAT3 ZFP36	0.019	5.113
GO:0032269	negative regulation of cellular protein metabolic process	GO Hierarchy	6	436	BDKRB2 DUSP2 DUSP5 TNFAIP3 TRIB1 ZFP36	0.018	5.11
GO:0010741	negative regulation of intracellular protein kinase cascade	GO Hierarchy	4	144	DUSP2 DUSP5 LIF TNFAIP3	0.018	5.075
GO:0060707	trophoblast giant cell differentiation	GO Hierarchy	2	10	LIF SNAI1	0.018	5.047
GO:0010628	positive regulation of gene expression	GO Hierarchy	9	1128	BMP2 CCL3 IRF1 JUNB KLF6 LIF NR4A2 SNAI1 STAT3	0.024	4.903
GO:0035556	intracellular signal transduction	GO Hierarchy	10	1399	BIRC3 CCL3 CXCL1 LIF RRAD SELE STAT3 TICAM1 TNFAIP3 TRIB1	0.024	4.898
GO:0009968	negative regulation of signal transduction	GO Hierarchy	7	664	BMP2 DUSP2 DUSP5 LIF SNAI1 TNFAIP3 TRIB1	0.025	4.802
GO:0040012	regulation of locomotion	GO Hierarchy	6	465	BMP2 CCL3 PTGS2 SELE SNAI1 TRIB1	0.025	4.77
GO:0006469	negative regulation of protein kinase activity	GO Hierarchy	4	157	DUSP2 DUSP5 TNFAIP3 TRIB1	0.024	4.749
GO:0051249	regulation of lymphocyte activation	GO Hierarchy	5	299	IL4R IRF1 MAP3K8 TICAM1 TNFAIP3	0.026	4.675
GO:0043408	regulation of MAPK cascade	GO Hierarchy	6	475	BMP2 CCL3 DUSP2 DUSP5 LIF TRIB1	0.027	4.658
GO:0051270	regulation of cellular component movement	GO Hierarchy	6	477	BMP2 CCL3 PTGS2 SELE SNAI1 TRIB1	0.027	4.636
GO:1902106	negative regulation of leukocyte differentiation	GO Hierarchy	3	64	CCL3 IL4R IRF1	0.026	4.623
GO:0022604	regulation of cell morphogenesis	GO Hierarchy	5	310	BMP2 CCL3 LIF PALMD SNAI1	0.029	4.511
GO:0050790	regulation of catalytic activity	GO Hierarchy	10	1471	ATF3 BIRC3 BMP2 CXCL1 DUSP2 DUSP5 NR4A2 SELE TNFAIP3 TRIB1	0.032	4.506
GO:0031664	regulation of lipopolysaccharide-mediated signaling pathway	GO Hierarchy	2	13	TNFAIP3 TRIB1	0.027	4.502
GO:0002832	negative regulation of response to biotic stimulus	GO Hierarchy	2	13	TNFAIP3 TRIB1	0.027	4.502
GO:0033673	negative regulation of kinase activity	GO Hierarchy	4	168	DUSP2 DUSP5 TNFAIP3 TRIB1	0.029	4.494
GO:0006468	protein phosphorylation	GO Hierarchy	6	493	BMP2 CCL3 CCL8 LIF MAP3K8 TRIB1	0.031	4.463
GO:0051248	negative regulation of protein metabolic process	GO Hierarchy	6	498	BDKRB2 DUSP2 DUSP5 TNFAIP3 TRIB1 ZFP36	0.032	4.411
GO:0048660	regulation of smooth muscle cell proliferation	GO Hierarchy	3	69	PTGS2 TNFAIP3 TRIB1	0.03	4.403
GO:0032479	regulation of type I interferon production	GO Hierarchy	3	70	IRF1 TICAM1 TNFAIP3	0.031	4.361
GO:1902105	regulation of leukocyte differentiation	GO Hierarchy	4	175	CCL3 IL4R IRF1 LIF	0.032	4.342
GO:0048584	positive regulation of response to stimulus	GO Hierarchy	9	1224	BIRC3 BMP2 CCL3 CFHR1 LIF PTGS2 STAT3 TICAM1 TNFAIP3	0.036	4.316
GO:0045597	positive regulation of cell differentiation	GO Hierarchy	6	509	BMP2 IL4R JUNB LIF PTGS2 SNAI1	0.035	4.297
GO:0051348	negative regulation of transferase activity	GO Hierarchy	4	179	DUSP2 DUSP5 TNFAIP3 TRIB1	0.034	4.257
GO:0031400	negative regulation of protein modification process	GO Hierarchy	5	331	BDKRB2 DUSP2 DUSP5 TNFAIP3 TRIB1	0.036	4.217
GO:1901700	response to oxygen-containing compound	GO Hierarchy	8	980	CCL3 JUNB PTGS2 SELE STAT3 TICAM1 TNFAIP3 TRIB1	0.04	4.189
GO:0065009	regulation of molecular function	GO Hierarchy	11	1852	ATF3 BIRC3 BMP2 CXCL1 DUSP2 DUSP5 NR4A2 SELE TICAM1 TNFAIP3 TRIB1	0.044	4.124
GO:0002694	regulation of leukocyte activation	GO Hierarchy	5	340	IL4R IRF1 MAP3K8 TICAM1 TNFAIP3	0.04	4.098
GO:0019220	regulation of phosphate metabolic process	GO Hierarchy	9	1275	ATF3 BDKRB2 BIRC3 BMP2 DUSP2 DUSP5 LIF TNFAIP3 TRIB1	0.045	4.028
GO:0048864	stem cell development	GO Hierarchy	4	191	BMP2 LIF SNAI1 STAT3	0.042	4.017
GO:0051240	positive regulation of multicellular organismal process	GO Hierarchy	6	538	BMP2 CCL3 IL4R IRF1 PTGS2 TICAM1	0.044	4.012
GO:0043122	regulation of I-kappaB kinase/NF-kappaB cascade	GO Hierarchy	4	194	BIRC3 PTGS2 TICAM1 TNFAIP3	0.044	3.959
GO:0051174	regulation of phosphorus metabolic process	GO Hierarchy	9	1288	ATF3 BDKRB2 BIRC3 BMP2 DUSP2 DUSP5 LIF TNFAIP3 TRIB1	0.048	3.957
GO:0010894	negative regulation of steroid biosynthetic process	GO Hierarchy	2	17	BMP2 SNAI1	0.042	3.953
GO:0001704	formation of primary germ layer	GO Hierarchy	3	82	DUSP2 DUSP5 SNAI1	0.044	3.901
GO:0001892	embryonic placenta development	GO Hierarchy	3	83	JUNB LIF SNAI1	0.045	3.866
GO:0034612	response to tumor necrosis factor	GO Hierarchy	3	83	CCL3 PTGS2 SELE	0.045	3.866
GO:0030728	ovulation	GO Hierarchy	2	18	IL4R PTGS2	0.045	3.837
GO:0060706	cell differentiation involved in embryonic placenta development	GO Hierarchy	2	18	LIF SNAI1	0.045	3.837
GO:0050865	regulation of cell activation	GO Hierarchy	5	365	IL4R IRF1 MAP3K8 TICAM1 TNFAIP3	0.05	3.783
GO:0002831	regulation of response to biotic stimulus	GO Hierarchy	3	87	BIRC3 TNFAIP3 TRIB1	0.049	3.73
GO:0045939	negative regulation of steroid metabolic process	GO Hierarchy	2	19	BMP2 SNAI1	0.049	3.728
GO:0061311	cell surface receptor signaling pathway involved in heart development	GO Hierarchy	2	19	BMP2 SNAI1	0.049	3.728
GO Hierarchy - Cellular Component Enrichment:
GO:0005615	extracellular space	GO Hierarchy	12	849	AREG BMP2 CCL20 CCL3 CCL8 CFHR1 CXCL1 CXCL2 CXCL3 IL4R LIF SELE	1.58e-05	13.552
GO:0044421	extracellular region part	GO Hierarchy	12	1137	AREG BMP2 CCL20 CCL3 CCL8 CFHR1 CXCL1 CXCL2 CXCL3 IL4R LIF SELE	0.000185	10.43
GO:0005576	extracellular region	GO Hierarchy	13	2163	AREG BMP2 CCL20 CCL3 CCL8 CFHR1 CXCL1 CXCL2 CXCL3 IL4R LIF PTX3 SELE	0.018	5.573
Diseases Enrichment (Cancer Gene Index):
C3262	tumor	Cancer Gene Index [CGI]	26	4076	AREG ATF3 BCL2A1 BDKRB2 BIRC3 BMP2 CCL20 CCL3 CCL8 CXCL1 CXCL2 CXCL3 DUSP2 DUSP5 IL4R IRF1 MAP3K8 NEDD9 NR4A2 PFKFB3 RRAD SELE STAT3 STX11 TICAM1 TNFAIP3	7.71e-07	18.1
C3138	ibd	Cancer Gene Index [CGI]	8	336	AREG BDKRB2 CCL3 CCL8 IL4R IRF1 SELE STAT3	0.000196	11.794
C4910	colon cancer	Cancer Gene Index [CGI]	11	913	AREG ATF3 BCL2A1 BIRC3 BMP2 CXCL2 CXCL3 IL4R IRF1 SELE STAT3	0.000483	10.544
C3512	lung adenocarcinoma	Cancer Gene Index [CGI]	7	300	AREG BCL2A1 BDKRB2 BMP2 MAP3K8 RRAD STAT3	0.001	9.816
C19151	tumor metastasis	Cancer Gene Index [CGI]	11	1004	AREG ATF3 BMP2 CXCL1 CXCL2 IL4R IRF1 NEDD9 RRAD SELE STAT3	0.001	9.626
C3871	human nasopharyngeal carcinoma	Cancer Gene Index [CGI]	6	208	BCL2A1 CCL8 IRF1 MAP3K8 STAT3 TNFAIP3	0.001	9.213
C9305	cancer	Cancer Gene Index [CGI]	17	2711	AREG ATF3 BCL2A1 BIRC3 BMP2 CCL3 CXCL1 DUSP5 IL4R IRF1 NEDD9 PFKFB3 RRAD SELE STAT3 TNFAIP3 ZFP36	0.001	9.079
C3270	human neuroblastoma	Cancer Gene Index [CGI]	10	856	ATF3 BDKRB2 BMP2 IL4R IRF1 NEDD9 NR4A2 RRAD SNAI1 STAT3	0.001	9.01
C9357	hodgkin's lymphoma	Cancer Gene Index [CGI]	6	223	BCL2A1 CCL3 CCL8 MAP3K8 SELE TNFAIP3	0.001	8.815
C3242	multiple myeloma (mm)	Cancer Gene Index [CGI]	8	513	AREG BCL2A1 BMP2 CCL3 IL4R IRF1 STAT3 ZFP36	0.001	8.655
C4872	breast cancer	Cancer Gene Index [CGI]	13	1807	AREG ATF3 BCL2A1 BMP2 CXCL2 IL4R IRF1 MAP3K8 RRAD SELE SNAI1 STAT3 TNFAIP3	0.003	7.412
C3224	melanoma	Cancer Gene Index [CGI]	10	1032	BCL2A1 BMP2 CCL8 CXCL1 CXCL2 IL4R IRF1 NEDD9 SELE STAT3	0.003	7.395
C4911	gastric cancers	Cancer Gene Index [CGI]	9	832	AREG BCL2A1 BMP2 CXCL1 CXCL2 IL4R IRF1 SNAI1 STAT3	0.003	7.195
C3171	acute nonlymphocytic leukemia (anll)	Cancer Gene Index [CGI]	8	657	BCL2A1 BMP2 IL4R IRF1 RRAD STAT3 STX11 TRIB1	0.004	6.89
C3161	leukaemia	Cancer Gene Index [CGI]	9	872	BCL2A1 CCL3 CCL8 DUSP2 IL4R IRF1 NR4A2 SELE STAT3	0.004	6.832
C3720	anaplastic large-cell lymphomas (alcls)	Cancer Gene Index [CGI]	4	106	BCL2A1 BIRC3 STAT3 TNFAIP3	0.006	6.251
C16936	oncogenes	Cancer Gene Index [CGI]	7	529	ATF3 BCL2A1 BMP2 CXCL2 IL4R IRF1 RRAD	0.006	6.183
C16317	b16 melanoma	Cancer Gene Index [CGI]	4	112	BMP2 CCL20 IL4R STAT3	0.006	6.038
C9385	renal-cell carcinoma	Cancer Gene Index [CGI]	6	376	BMP2 CCL3 IL4R IRF1 SELE STAT3	0.007	5.905
C3058	glioblastoma	Cancer Gene Index [CGI]	7	564	AREG CCL20 DUSP5 IL4R NEDD9 STAT3 TNFAIP3	0.008	5.788
C3059	c6 glioma	Cancer Gene Index [CGI]	8	775	AREG BDKRB2 BMP2 CCL20 CXCL2 IL4R NR4A2 STAT3	0.008	5.748
C3043	fibrosarcoma	Cancer Gene Index [CGI]	5	237	CXCL2 IL4R IRF1 STAT3 TNFAIP3	0.008	5.741
C2929	squamous-cell carcinoma	Cancer Gene Index [CGI]	7	581	AREG BIRC3 BMP2 CXCL1 IL4R IRF1 STAT3	0.008	5.607
C3234	mesothelioma	Cancer Gene Index [CGI]	4	139	AREG BIRC3 BMP2 IL4R	0.011	5.21
C2955	colorectal carcinomas	Cancer Gene Index [CGI]	8	847	AREG ATF3 BCL2A1 CXCL2 IL4R SELE STAT3 ZFP36	0.012	5.149
C18128	leukemogenesis	Cancer Gene Index [CGI]	4	150	IL4R IRF1 NEDD9 TNFAIP3	0.013	4.921
C8509	primary tumors	Cancer Gene Index [CGI]	7	658	AREG ATF3 BMP2 CCL3 MAP3K8 PFKFB3 STAT3	0.015	4.856
C19361	tumor angiogenesis	Cancer Gene Index [CGI]	4	164	AREG BMP2 CXCL1 STAT3	0.017	4.585
C3113	cell hyperplasia	Cancer Gene Index [CGI]	7	730	AREG BCL2A1 BMP2 IL4R IRF1 STAT3 ZFP36	0.025	4.243
C3208	lymphomas	Cancer Gene Index [CGI]	7	737	BIRC3 CCL3 IL4R IRF1 MAP3K8 STAT3 TNFAIP3	0.025	4.188
C4908	ovarian carcinomas	Cancer Gene Index [CGI]	6	530	AREG CCL3 DUSP2 IL4R IRF1 STAT3	0.025	4.089
C4456	malignant mesothelioma	Cancer Gene Index [CGI]	3	77	AREG BMP2 IL4R	0.025	4.083
C8851	dlbcl	Cancer Gene Index [CGI]	4	191	BCL2A1 BIRC3 CCL3 TNFAIP3	0.025	4.017
C3146	keratoacanthoma	Cancer Gene Index [CGI]	2	17	AREG CXCL1	0.025	3.953
C3269	schwannomas	Cancer Gene Index [CGI]	3	82	AREG BMP2 STAT3	0.026	3.901
C16897	necrosis	Cancer Gene Index [CGI]	5	360	ATF3 BMP2 CXCL2 IRF1 TNFAIP3	0.028	3.844
C2921	sporadic basal cell carcinomas	Cancer Gene Index [CGI]	4	204	BMP2 CXCL1 IRF1 STAT3	0.029	3.774
C2926	non-small cell lung cancer	Cancer Gene Index [CGI]	6	570	AREG BDKRB2 BMP2 IL4R RRAD STAT3	0.032	3.717
C7431	primary ovarian cancers	Cancer Gene Index [CGI]	6	575	ATF3 BCL2A1 BMP2 IL4R IRF1 STAT3	0.033	3.672
C4912	bladder cancer	Cancer Gene Index [CGI]	5	395	AREG BCL2A1 BIRC3 IL4R STAT3	0.038	3.437
C23988	mouse tumor	Cancer Gene Index [CGI]	3	97	ATF3 MAP3K8 NEDD9	0.037	3.418
C2916	carcinomas	Cancer Gene Index [CGI]	8	1112	AREG BCL2A1 BMP2 CCL8 IL4R IRF1 SELE STAT3	0.043	3.387
C4863	carcinoma of the prostate	Cancer Gene Index [CGI]	8	1134	AREG ATF3 BDKRB2 BIRC3 BMP2 IL4R STAT3 TNFAIP3	0.048	3.265
C21603	murine sarcomas	Cancer Gene Index [CGI]	2	24	IL4R IRF1	0.041	3.258
C9039	cervical cancer	Cancer Gene Index [CGI]	5	425	AREG BCL2A1 IL4R IRF1 STAT3	0.049	3.12
C3850	human pancreatic carcinoma	Cancer Gene Index [CGI]	6	642	AREG BMP2 IL4R IRF1 SELE STAT3	0.05	3.12
C2978	cysts	Cancer Gene Index [CGI]	4	249	AREG BMP2 CXCL2 SELE	0.05	3.049
Pathways Enrichment (KEGG, NCI):
path:hsa04060	Cytokine-cytokine receptor interaction	KEGG	9	247	BMP2 CCL20 CCL3 CCL8 CXCL1 CXCL2 CXCL3 IL4R LIF	4.71e-07	17.342
200135	ATF-2 transcription factor network	NCI	4	59	ATF3 DUSP5 JUNB SELE	0.002	8.56
200120	Direct p53 effectors	NCI	5	135	ATF3 BCL2A1 BDKRB2 DUSP5 LIF	0.002	8.415
200229	IL12 signaling mediated by STAT4	NCI	3	29	IL18R1 IRF1 STAT3	0.004	6.995
200154	IL23-mediated signaling events	NCI	3	37	CXCL1 IL18R1 STAT3	0.006	6.255
200146	IL6-mediated signaling events	NCI	3	45	IRF1 JUNB STAT3	0.009	5.667
200045	IL12-mediated signaling events	NCI	3	61	CCL3 IL18R1 STAT3	0.019	4.764
