# Supplementary material for: Computational Reconstruction of NFκB Pathway Interaction Mechanisms during Prostate Cancer
Source: PLoS Comput Biol. 2016 Apr 14;12(4):e1004820. doi: 10.1371/journal.pcbi.1004820 (PMC4831844; doi:10.1371/journal.pcbi.1004820)
Supplement: S15 Table — (A) Comparison of all high-confidence predictions from the novel NFκB pathway (Fig 2) with co-expression values as retrieved from the TCGA dataset, revealing 70% of all predicted high-confidence interactions in this pathway to be co-expressed in the TCGA dataset as well. (B) Comparison of random negative predictions from the genome (1:1 positive:negative ratio) with co-expression values as retrieved from the TCGA dataset, revealing that <10% randomly chosen low-confident predictions were significantly co-expressed in the TCGA dataset. For visualization see S6 and S7 Figs. (XLSX) [file pcbi.1004820.s022.xlsx]

## Sheet: Sheet1
S15 Table: We compared our predictions with co-expression relationships inferred from the TCGA dataset (see Methods). (A) Comparison of all high-confidence predictions from the novel NFκB pathway (Fig. 2) with co-expression values as retrieved from the TCGA dataset, revealing 70% of all predicted high-confidence interactions in this pathway to be co-expressed in the TCGA dataset as well. (B) Comp…
(A) High-confident predictions
Interactor A	Interactor B	Confidence Score	Predicted Mechanism	Normalized Coexpression (TCGA)	Pvalue (TCGA)	Number of significantly coexpressed gene pairs
AREG	PTGS2	1	complex	-0.028393	0.511326
ATF3	DUSP2	1	complex	2.09258	0.0181933
BMP2	NFKBIA	1	complex	1.70754	0.0438609
CCL20	PTGS2	1	complex	-0.143632	0.557104
CHUK	IKBKG	1	complex	-2.73067	0.99684
CXCL1	LIF	1	complex	2.09003	0.0183076
CXCL1	RELB	1	complex	3.20932	0.000665247
CXCL2	SELE	1	complex	1.72178	0.0425547
CXCL3	PTGS2	1	complex	0.0293502	0.488293
DUSP2	JUNB	1	complex	1.6711	0.047351
DUSP2	ZFP36	1	complex	1.98134	0.0237766
DUSP5	STX11	1	complex	3.08288	0.00102504
IKBKB	IKBKG	1	complex	0.00869524	0.496531
NEDD9	NFKBIA	1	complex	1.79482	0.0363412
NFKB1	STX11	1	complex	2.43272	0.00749294
NFKB2	NFKBIE	1	complex	3.53912	0.000200732
NFKBIE	RELA	1	complex	1.94675	0.0257824
NR4A2	REL	1	complex	1.68794	0.0457114
PTGS2	TRIB1	1	complex	-0.315847	0.623941	13	0.6842
AREG	DUSP5	1	covalent	6.80062	5.2085e-12
AREG	DUSP5	1	covalent	6.80062	5.2085e-12
DUSP5	NFKBIE	1	covalent	1.64659	0.0498212
CHUK	IKBKB	1	covalent	0.19125	0.424165
IKBKB	NFKB2	1	covalent	1.98774	0.0234202
IKBKB	TRIB1	0.974812	covalent	0.278072	0.390479	4	0.6667
ATF3	MAP3K8	1	shared pathway	2.30741	0.010516
BCL2A1	NFKBIE	1	shared pathway	3.17492	0.000749389
BCL2A1	RELB	1	shared pathway	3.04479	0.00116421
CCL20	MAP3K8	1	shared pathway	1.74465	0.0405229
CXCL2	MAP3K8	1	shared pathway	2.42951	0.00755962
CXCL3	SELE	1	shared pathway	0.768185	0.221189
DUSP2	IER2	1	shared pathway	1.7675	0.0385723
DUSP5	MAP3K8	1	shared pathway	3.06315	0.0010951
IER2	IL4R	1	shared pathway	0.781516	0.21725
IER2	TRIB1	1	shared pathway	3.55953	0.00018576
JUNB	MAP3K8	1	shared pathway	2.04046	0.0206523
NEDD9	ZFP36	1	shared pathway	2.51845	0.00589363
NFKB1	RELA	1	shared pathway	1.88251	0.0298831
NFKBIA	RELA	0.999999	shared pathway	0.441081	0.329577
NFKBIE	RELB	1	shared pathway	4.67209	1.49075e-06	12	0.8
CHUK	RELA	0.997935	phosphorylation	-1.10989	0.866477
DUSP5	TNFAIP3	1	phosphorylation	2.85072	0.00218102
CHUK	IKBKB	0.999863	phosphorylation	0.19125	0.424165
IKBKB	NFKB1	0.999995	phosphorylation	1.89138	0.0292867
IKBKG	NFKB2	0.999947	phosphorylation	1.67784	0.0466892
BIRC3	MAP3K8	1	phosphorylation	2.32418	0.0100579
MAP3K8	NR4A2	0.996229	phosphorylation	3.19579	0.000697243
MAP3K8	PFKFB3	0.999999	phosphorylation	2.9512	0.00158271
MAP3K8	PTX3	0.997742	phosphorylation	1.73515	0.0413571	7	0.7778
AREG	ATF3	1	physical	1.84797	0.0323033
AREG	ZFP36	1	physical	2.20464	0.0137397
ATF3	NR4A2	1	physical	5.36952	3.94732e-08
ATF3	SELE	1	physical	2.17024	0.0149943
BCL2A1	PTGS2	1	physical	-0.368794	0.643859
BCL2A1	REL	1	physical	1.85032	0.0321337
BIRC3	NEDD9	1	physical	1.01953	0.153976
BMP2	NFKBIA	1	physical	1.70754	0.0438609
BMP2	STAT3	0.553392	physical	0.0907054	0.463863
CCL20	CXCL1	1	physical	5.98959	1.05185e-09
CCL8	CXCL2	0.999999	physical	1.01735	0.154493
CXCL1	NFKB2	1	physical	1.68988	0.0455255
CXCL1	RELB	1	physical	3.20932	0.000665247
CXCL1	TNFAIP3	1	physical	4.25559	1.04249e-05
CXCL1	TRIB1	1	physical	0.878499	0.189836
CXCL2	PTGS2	1	physical	0.29735	0.3831
CXCL3	IER3	1	physical	0.717583	0.236507
CXCL3	PTGS2	1	physical	0.0293502	0.488293
CXCL3	SELE	0.999997	physical	0.768185	0.221189
DUSP2	JUNB	1	physical	1.6711	0.047351
IER3	IL4R	1	physical	2.1653	0.0151824
IKBKB	IKBKG	1	physical	0.00869524	0.496531
IL18R1	NFKB1	0.999365	physical	-0.084682	0.533743
JUNB	NR4A2	1	physical	4.46618	3.98143e-06
JUNB	TNFAIP3	1	physical	1.86926	0.0307933
LIF	PTGS2	1	physical	-0.0625407	0.524934
LIF	RELB	1	physical	1.73462	0.0414041
NEDD9	NFKBIA	1	physical	1.79482	0.0363412
NEDD9	ZFP36	1	physical	2.51845	0.00589363
NFKB1	PTGS2	1	physical	-0.348927	0.636428
NFKB1	REL	1	physical	2.99122	0.00138933
NFKBIA	STX11	1	physical	2.04149	0.0206011
NFKBIE	RELA	1	physical	1.94675	0.0257824
NR4A2	PTGS2	1	physical	1.84595	0.0324497
NR4A2	REL	1	physical	1.68794	0.0457114
PTGS2	SELE	1	physical	-0.165457	0.565708
PTGS2	TRIB1	1	physical	-0.315847	0.623941
TRIB1	ZFP36	1	physical	3.57667	0.000174	23	0.6053
ATF3	KLF6	1	regulatory	6.07868	6.0588e-10
CCL8	NFKB1	0.992212	regulatory	1.90483	0.0284008
CXCL2	SELE	1	regulatory	1.72178	0.0425547
DUSP5	TNFAIP3	1	regulatory	2.85072	0.00218102
IER3	TRIB1	1	regulatory	0.283355	0.388452
IL18R1	REL	0.997904	regulatory	0.285517	0.387624
IL18R1	RELB	0.9972	regulatory	-0.125708	0.550018
IRF1	STAT3	1	regulatory	1.93735	0.0263513
IER3	JUNB	1	regulatory	1.91245	0.0279093
KLF6	NFKBIA	1	regulatory	1.20262	0.114562
KLF6	ZFP36	1	regulatory	5.91328	1.67681e-09
BIRC3	MAP3K8	1	regulatory	2.32418	0.0100579
IRF1	NFKB1	1	regulatory	2.16782	0.0150862
NFKB1	RELA	0.995601	regulatory	1.88251	0.0298831
BIRC3	NFKBIE	1	regulatory	2.8172	0.00242222
BIRC3	REL	1	regulatory	2.33431	0.00978975
RELB	TICAM1	1	regulatory	1.88951	0.0294118	13	0.7647
ATF3	PALMD	1	synthetic	1.75499	0.0396303
BDKRB2	JUNB	1	synthetic	1.69331	0.0451982
CFHR1	NEDD9	1	synthetic	1.71794	0.0429037
CXCL2	IL18R1	1	synthetic	0.2355	0.40691
GPR171	SELE	1	synthetic	1.69698	0.04485
IL18R1	NFKBIA	1	synthetic	2.21638	0.0133327
NFKBIE	RRAD	1	synthetic	0.140642	0.444076
SNAI1	ZFP36	1	synthetic	2.5162	0.00593139	6	0.75
				Number of significantly coexpressed gene pairs:		78	0.7027
(B) Random predictions
Interactor A	Interactor B	Confidence Score		Normalized Coexpression (TCGA)	Pvalue (TCGA)	Number of significantly coexpressed gene pairs
RECQL5	G2E3	0.447754	functional relationship	-2.64189	0.995878
GBP3	G2E3	0.499031	functional relationship	0.113514	0.454812
AZU1	G2E3	0.345339	functional relationship	-0.952849	0.829667
TSEN2	G2E3	0.444296	functional relationship	0.395336	0.346297
CHD6	G2E3	0.448431	functional relationship	2.27184	0.0115481
PTCD2	G2E3	0.389896	functional relationship	1.02364	0.153003
SLCO1C1	G2E3	0.478555	functional relationship	0.125693	0.449987
MNDA	G2E3	0.46087	functional relationship	1.24949	0.105743
VWA2	G2E3	0.420653	functional relationship	1.37051	0.0852639
ARRDC3	G2E3	0.507677	functional relationship	2.17769	0.0147146
RECQL5	NIPBL	0.000514512	functional relationship	-1.08289	0.860571
GBP3	NIPBL	0.324262	functional relationship	0.413413	0.339652
AZU1	NIPBL	6.52e-07	functional relationship	-0.844723	0.800867
TSEN2	NIPBL	0.998566	functional relationship	0.547093	0.292157	excluded (this pair is a positive prediction: score>0.9)
CHD6	NIPBL	0.815923	functional relationship	3.8728	5.37961e-05
PTCD2	NIPBL	0.439454	functional relationship	1.16382	0.122248
SLCO1C1	NIPBL	1.96e-05	functional relationship	0.427535	0.334495
MNDA	NIPBL	0.000182923	functional relationship	2.02382	0.0214943
VWA2	NIPBL	0.453112	functional relationship	1.44474	0.0742655
ARRDC3	NIPBL	0.302581	functional relationship	1.90337	0.0284961
RECQL5	PRKAA1	0.0315889	functional relationship	-2.49316	0.993669
GBP3	PRKAA1	0.985201	functional relationship	0.362237	0.358587	excluded (this pair is a positive prediction: score>0.9)
AZU1	PRKAA1	1.52e-05	functional relationship	-0.256199	0.601101
TSEN2	PRKAA1	0.17222	functional relationship	0.310472	0.378101
CHD6	PRKAA1	0.67351	functional relationship	2.61267	0.0044919
PTCD2	PRKAA1	0.0499136	functional relationship	1.349	0.0886685
SLCO1C1	PRKAA1	0.000263986	functional relationship	0.538438	0.295137
MNDA	PRKAA1	0.00242477	functional relationship	0.706492	0.239941
VWA2	PRKAA1	0.221122	functional relationship	0.63939	0.261285
ARRDC3	PRKAA1	0.998636	functional relationship	1.24772	0.106067	excluded (this pair is a positive prediction: score>0.9)
RECQL5	SLC44A4	0.00635894	functional relationship	-0.36725	0.643284
GBP3	SLC44A4	0.019515	functional relationship	-0.388071	0.651018
AZU1	SLC44A4	0.0197812	functional relationship	0.856553	0.195846
TSEN2	SLC44A4	1.01e-05	functional relationship	-0.798819	0.787802
CHD6	SLC44A4	0.229657	functional relationship	0.49168	0.311473
PTCD2	SLC44A4	0.00124811	functional relationship	-0.89654	0.815018
SLCO1C1	SLC44A4	0.116538	functional relationship	-0.064418	0.525681
MNDA	SLC44A4	8.52e-05	functional relationship	-1.01654	0.845314
VWA2	SLC44A4	0.416653	functional relationship	0.801929	0.211297
ARRDC3	SLC44A4	0.61701	functional relationship	-0.638799	0.738523
RECQL5	OR51A2	0.321959	functional relationship	-0.356142	0.639133
GBP3	OR51A2	0.365339	functional relationship	0.0543477	0.478329
AZU1	OR51A2	0.392875	functional relationship	-0.275451	0.608515
TSEN2	OR51A2	0.407946	functional relationship	-0.215124	0.585165
CHD6	OR51A2	0.415908	functional relationship	0.524519	0.299959
PTCD2	OR51A2	0.362475	functional relationship	-0.13535	0.553832
SLCO1C1	OR51A2	0.37967	functional relationship	0.294232	0.38429
MNDA	OR51A2	0.45213	functional relationship	0.122716	0.451166
VWA2	OR51A2	0.420653	functional relationship	0.293184	0.384691
ARRDC3	OR51A2	0.420653	functional relationship	-0.107212	0.54269
RECQL5	ZMYM2	0.000384298	functional relationship	-1.41652	0.921688
GBP3	ZMYM2	0.542242	functional relationship	-0.158002	0.562772
AZU1	ZMYM2	6.8e-06	functional relationship	-0.508178	0.694336
TSEN2	ZMYM2	0.111989	functional relationship	0.826715	0.204199
CHD6	ZMYM2	0.991233	functional relationship	3.13848	0.000849133	excluded (this pair is a positive prediction: score>0.9)
PTCD2	ZMYM2	0.895165	functional relationship	0.809625	0.209078
SLCO1C1	ZMYM2	0.000331485	functional relationship	0.298611	0.382618
MNDA	ZMYM2	8.7e-07	functional relationship	0.259086	0.397784
VWA2	ZMYM2	0.20032	functional relationship	1.6598	0.0484773
ARRDC3	ZMYM2	0.995828	functional relationship	0.414511	0.33925	excluded (this pair is a positive prediction: score>0.9)
RECQL5	LYPD6	0.380158	functional relationship	-0.652369	0.742918
GBP3	LYPD6	0.162981	functional relationship	-0.0988168	0.539358
AZU1	LYPD6	0.314328	functional relationship	-0.239693	0.594716
TSEN2	LYPD6	0.0256379	functional relationship	-0.804037	0.789312
CHD6	LYPD6	0.448515	functional relationship	2.27842	0.0113508
PTCD2	LYPD6	0.780601	functional relationship	0.461701	0.322148
SLCO1C1	LYPD6	0.0309586	functional relationship	-0.733051	0.768236
MNDA	LYPD6	0.00801327	functional relationship	-0.30724	0.62067
VWA2	LYPD6	0.446702	functional relationship	-0.126143	0.550191
ARRDC3	LYPD6	0.0683799	functional relationship	-0.426184	0.665013
RECQL5	CPLX4	0.411494	functional relationship	0.991376	0.160751
GBP3	CPLX4	0.422756	functional relationship	-0.499289	0.691212
AZU1	CPLX4	0.437311	functional relationship	0.260068	0.397406
TSEN2	CPLX4	0.415512	functional relationship	0.0216559	0.491361
CHD6	CPLX4	0.403892	functional relationship	-0.877031	0.809765
PTCD2	CPLX4	0.416653	functional relationship	-0.0721571	0.528762
SLCO1C1	CPLX4	0.418764	functional relationship	-0.350855	0.637151
MNDA	CPLX4	0.452432	functional relationship	-1.02887	0.84823
VWA2	CPLX4	0.409967	functional relationship	-0.348665	0.63633
ARRDC3	CPLX4	0.415466	functional relationship	-1.31432	0.905631
RECQL5	TYROBP	4.08e-07	functional relationship	-0.359421	0.64036
GBP3	TYROBP	0.977925	functional relationship	0.260797	0.397125	excluded (this pair is a positive prediction: score>0.9)
AZU1	TYROBP	0.400222	functional relationship	0.631411	0.263886
TSEN2	TYROBP	9.27e-07	functional relationship	-0.0906534	0.536116
CHD6	TYROBP	0.0086969	functional relationship	-0.9095	0.818457
PTCD2	TYROBP	4.71e-06	functional relationship	-0.618656	0.731928
SLCO1C1	TYROBP	2.04e-05	functional relationship	1.18849	0.11732
MNDA	TYROBP	1	functional relationship	3.90123	4.78526e-05	excluded (this pair is a positive prediction: score>0.9)
VWA2	TYROBP	0.459011	functional relationship	-0.769683	0.779256
ARRDC3	TYROBP	0.810943	functional relationship	1.46771	0.0710915
RECQL5	TAS1R3	0.371667	functional relationship	0.889165	0.186957
GBP3	TAS1R3	0.318553	functional relationship	0.353389	0.361898
AZU1	TAS1R3	0.586638	functional relationship	0.270713	0.393306
TSEN2	TAS1R3	0.364743	functional relationship	-0.0189647	0.507565
CHD6	TAS1R3	0.426842	functional relationship	-0.447915	0.672893
PTCD2	TAS1R3	0.526003	functional relationship	-0.707895	0.760495
SLCO1C1	TAS1R3	0.448701	functional relationship	0.303009	0.380942
MNDA	TAS1R3	0.281906	functional relationship	2.06449	0.0194856
VWA2	TAS1R3	0.411199	functional relationship	-0.142789	0.556772
ARRDC3	TAS1R3	0.431618	functional relationship	0.92706	0.176948
EPCAM	TOMM40L	0.41081	functional relationship	0.243216	0.403919
TEPP	TOMM40L	0.351048	functional relationship	0.543254	0.293477
LRRTM1	TOMM40L	0.197585	functional relationship	1.34784	0.0888549
GTPBP3	TOMM40L	0.774288	functional relationship	0.181483	0.427994
C1orf177	TOMM40L	0.321903	functional relationship	-0.33391	0.630776
EPCAM	CACNA1F	0.342852	functional relationship	-0.639923	0.738889
TEPP	CACNA1F	0.338543	functional relationship	1.62396	0.0521922
LRRTM1	CACNA1F	0.674759	functional relationship	1.34481	0.0893433
GTPBP3	CACNA1F	0.984691	functional relationship	0.216086	0.41446	excluded (this pair is a positive prediction: score>0.9)
C1orf177	CACNA1F	0.402657	functional relationship	-0.0395566	0.515777
EPCAM	ACTR2	0.703637	functional relationship	0.866266	0.193172
TEPP	ACTR2	0.409302	functional relationship	-1.35984	0.91306
LRRTM1	ACTR2	0.0317341	functional relationship	-0.658909	0.745023
GTPBP3	ACTR2	0.0821941	functional relationship	-1.16905	0.878808
C1orf177	ACTR2	0.362754	functional relationship	-0.474053	0.682269
EPCAM	ITPRIP	0.367269	functional relationship	-2.31251	0.989625
TEPP	ITPRIP	0.417689	functional relationship	1.05549	0.145601
LRRTM1	ITPRIP	0.338543	functional relationship	1.4077	0.07961
GTPBP3	ITPRIP	0.410954	functional relationship	-1.24363	0.893182
C1orf177	ITPRIP	0.338543	functional relationship	0.130396	0.448127
EPCAM	PLEKHG1	0.471375	functional relationship	-1.52093	0.935861
TEPP	PLEKHG1	0.343806	functional relationship	1.36875	0.0855387
LRRTM1	PLEKHG1	0.0142467	functional relationship	1.28664	0.0991099
GTPBP3	PLEKHG1	0.262182	functional relationship	-0.828702	0.796363
C1orf177	PLEKHG1	0.329793	functional relationship	-0.435179	0.668284
				Number of significantly coexpressed gene pairs:		11	0.094
